# Supplementary material for: Single-Cell RNA Sequencing of Human Pluripotent Stem Cell-Derived Macrophages for Quality Control of The Cell Therapy Product
Source: Front Genet. 2022 Jan 31;12:658862. doi: 10.3389/fgene.2021.658862 (PMC8841343; doi:10.3389/fgene.2021.658862)
Supplement: Supplementary file 1 [file Table2.XLSX]

## Sheet: ILoReg
Supplementary Table 3. DEGs of each cluster analysed by ILoReg method
hESC-iMAC
p.value	adj.p.value	log2FC	pct.1	pct.2	diff.pct	cluster	gene
4.49148e-165	6.54633e-161	-1.31304	0.643599	0.998864	0.355265	3	MALAT1
1.01169e-126	1.47454e-122	-1.29966	0.0968858	0.884513	0.787628	3	NEAT1
1.31619e-162	1.91835e-158	-1.20197	0.460208	0.997349	0.537142	3	PSAP
2.84416e-153	4.14536e-149	-1.14877	0.3391	0.98599	0.64689	3	GRN
3.53584e-136	5.15348e-132	-1.14166	0.269896	0.959864	0.689967	3	CTSZ
1.17369e-133	1.71066e-129	-1.11585	0.176471	0.944339	0.767869	3	APLP2
3.0995e-123	4.51752e-119	-1.10053	0.0622837	0.882242	0.819958	3	CD4
2.09689e-158	3.05622e-154	-1.08354	0.546713	0.997349	0.450637	3	STAB1
4.48493e-121	6.53679e-117	-1.07511	0.121107	0.899659	0.778552	3	TTYH3
2.81048e-119	4.09628e-115	1.03341	0.901961	0.298239	0.603722	4	CKS2
1.4565e-66	2.12284e-62	1.07016	0.862745	0.449376	0.413369	4	HIST1H4C
3.84927e-195	5.61031e-191	1.10195	0.946078	0.14967	0.796409	4	KIAA0101
2.07059e-150	3.01789e-146	1.13095	0.921569	0.227073	0.694496	4	HMGB2
7.30391e-240	1.06454e-235	1.13896	0.882353	0.0880411	0.794312	4	PTTG1
8.2353e-258	1.20029e-253	1.16042	0.803922	0.0568599	0.747062	4	UBE2C
1.08192e-131	1.5769e-127	1.17414	0.97549	0.370139	0.605351	4	TOP2A
7.46937e-73	1.08866e-68	-1.07372	0.273684	0.865328	0.591644	5	IGFBP4
2.23671e-124	3.26e-120	1.20764	0.952632	0.310949	0.641683	5	PLIN2
hiPSC-iMAC
p.value	adj.p.value	log2FC	pct.1	pct.2	diff.pct	cluster	gene
4.22028e-283	6.91789e-279	1.01677	0.870849	0.0795796	0.791269	1	CDK1
3.94016e-251	6.45871e-247	1.03262	0.926199	0.128378	0.797821	1	KIAA0101
3.6006e-106	5.90211e-102	1.04309	0.933579	0.597222	0.336357	1	HIST1H4C
3.82448e-249	6.26908e-245	1.14659	0.881919	0.0994745	0.782444	1	MKI67
6.33107e-289	1.03779e-284	1.19143	0.948339	0.113363	0.834976	1	TYMS
5.01111e-155	8.21421e-151	1.19554	0.98155	0.427553	0.553997	1	TOP2A
2.29102e-65	3.75544e-61	-1.02287	0.565	0.897623	0.332623	3	F13A1
1.88165e-169	3.08439e-165	1.0722	0.898936	0.147434	0.751503	4	IFIT1
2.10011e-130	3.4425e-126	1.17879	0.973404	0.311613	0.661792	4	MX1
8.41437e-111	1.37928e-106	1.28627	0.994681	0.600291	0.39439	4	ISG15
8.88233e-105	1.45599e-100	1.00248	0.92381	0.155124	0.768686	5	NUSAP1
1.20664e-146	1.97793e-142	1.02312	0.847619	0.0837456	0.763873	5	ASPM
1.84599e-141	3.02595e-137	1.02788	0.87619	0.0985866	0.777604	5	HMMR
7.19678e-143	1.1797e-138	1.0923	0.92381	0.120141	0.803668	5	CCNB1
4.18092e-55	6.85337e-51	1.10556	0.971429	0.460424	0.511005	5	TOP2A
4.04079e-132	6.62366e-128	1.10573	0.914286	0.118021	0.796265	5	TPX2
2.43919e-125	3.99832e-121	1.14151	0.961905	0.161131	0.800774	5	PTTG1
8.24762e-118	1.35195e-113	1.28747	0.942857	0.14311	0.799748	5	MKI67
1.23999e-130	2.03259e-126	1.38452	0.933333	0.133922	0.799411	5	CENPF
1.41036e-226	2.31186e-222	1.29338	0.946058	0.160356	0.785702	7	HLA-DRB1
1.32725e-157	2.17563e-153	1.42872	0.995851	0.42539	0.570461	7	CD74
6.5588e-239	1.07512e-234	1.6128	0.995851	0.184855	0.810995	7	HLA-DRA
9.68496e-155	1.58756e-150	1.34771	1	0.373481	0.626519	9	CCL3
1.25829e-279	2.06259e-275	1.36261	0.954545	0.102394	0.852151	9	CCL4
